# Supplementary material
Source: Springer Nature journal article supplement (https://www.springermedizin.de/resource/supplementary/12969_2010_804_MOESM6_ESM.pdf/9593044)

(a)

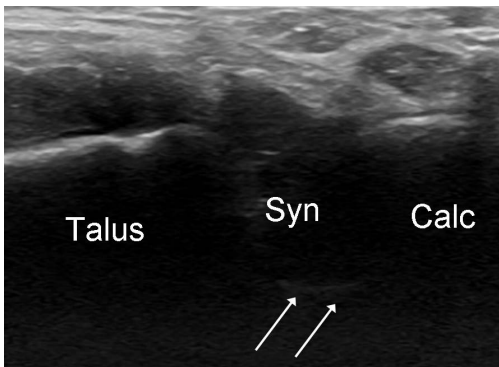

(b)

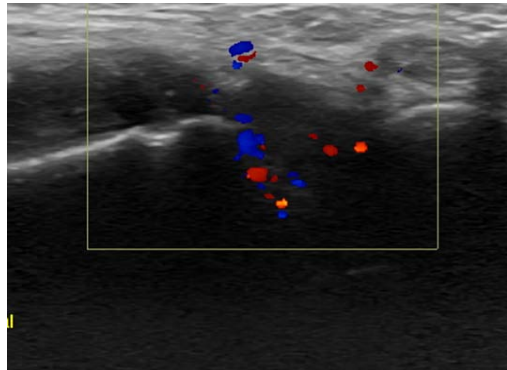

(c)

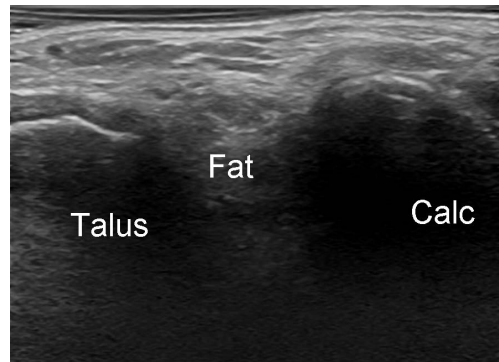

(d)

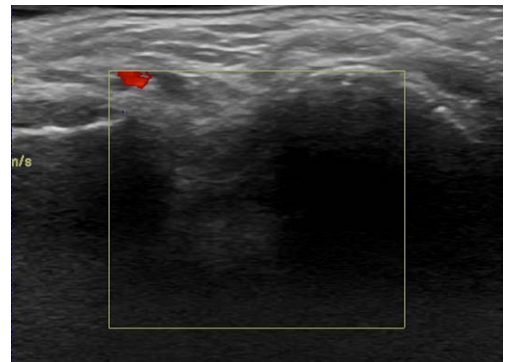

Supplement: MOESM6 [file 9593044]
